# Supplementary material for: Proteomics-based identification of VDAC1 as a tumor promoter in cervical carcinoma
Source: PubMed Central journal article supplement (PMC5239554; doi:10.18632/oncotarget.10562), 2016-07-13
Supplement: oncotarget-07-52317-s001.pdf [file oncotarget-07-52317-s001.pdf]

## Proteomics-based identification of VDAC1 as a tumor promoter in cervical carcinoma

### SUPPLEMENTARY FIGURES AND TABLES

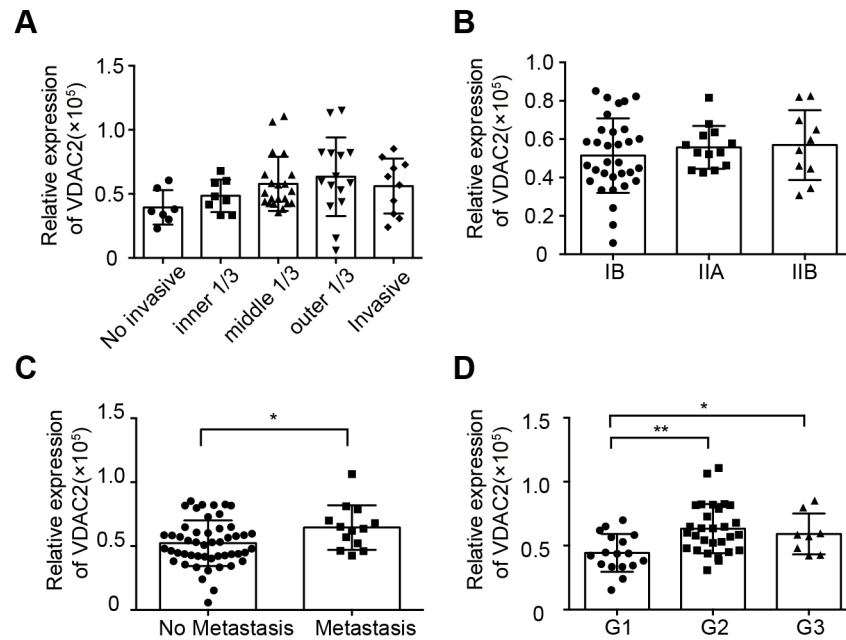

**Supplementary Figure 1: VDAC2 expression correlated with the metastasis and differentiation status in cervical cancer.** The expression of VDAC2 in cervical cancer specimens was detected by IHC staining. And the relationships between the levels of VDAC2 and clinicopathologic features were estimated. **A.** The relative expression of VDAC2 in cervical cancer tissues with different invasive depths. **B.** The relative expression of VDAC2 in cervical cancer tissues according to FIGO staging. **C.** The relative expression of VDAC2 in cervical cancer tissues with or without metastasis. \*,  $P < 0.05$ . **D.** The relative expression of VDAC2 in cervical cancer tissues according to differentiation status: G1, well-differentiated; G2, moderately differentiated; G3, poorly differentiated. The data are presented as the mean  $\pm$  SD with scatter plots representing the individual detailed protein levels.

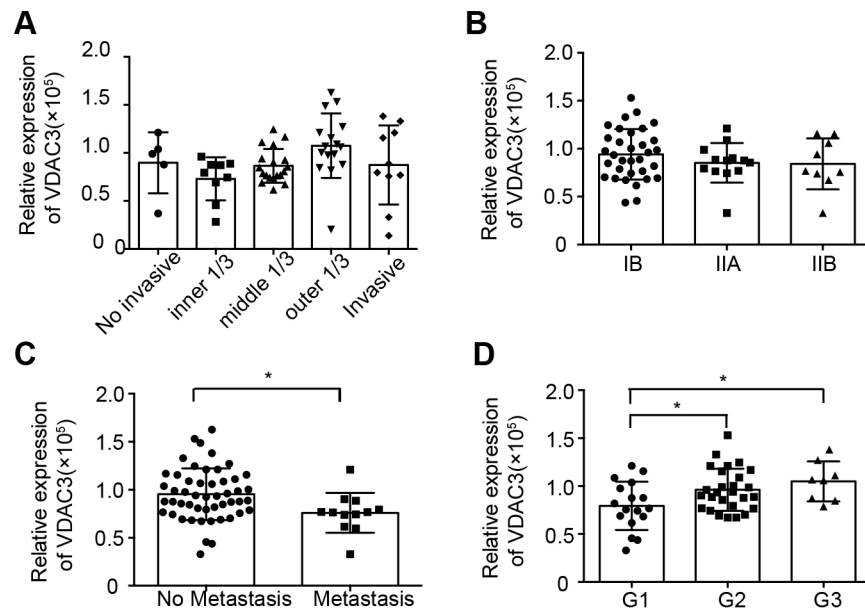

**Supplementary Figure 2: VDAC3 expression correlated with the metastasis and differentiation status in cervical cancer.** The expressions of VDAC3 in cervical cancer specimens was detected by IHC staining. And the relationships between the levels of VDAC3 and clinicopathologic features were estimated. **A.** The relative expression of VDAC3 in cervical cancer tissues with different invasive depths. **B.** The relative expression of VDAC3 in cervical cancer tissues according to FIGO staging. **C.** The relative expression of VDAC3 in cervical cancer tissues with or without metastasis. \*,  $P < 0.05$ . **D.** The relative expression of VDAC3 in cervical cancer tissues according to differentiation status: G1, well-differentiated; G2, moderately differentiated; G3, poorly differentiated. The data are presented as the mean  $\pm$  SD with scatter plots representing the individual detailed protein levels.

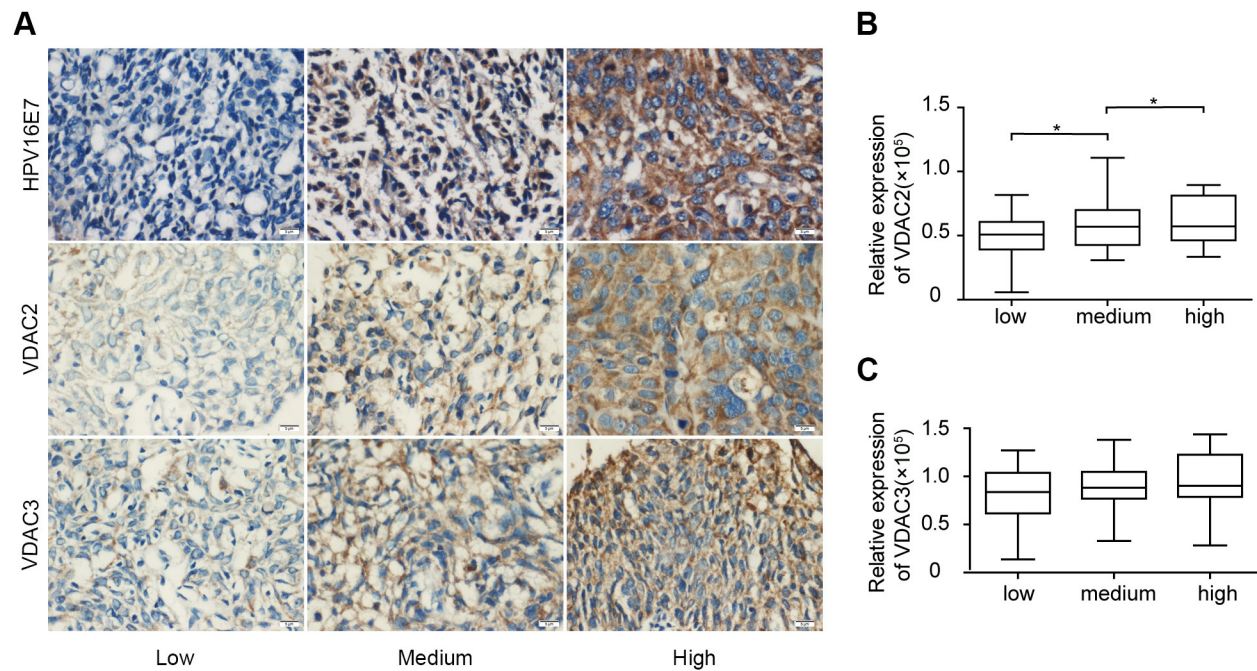

**Supplementary Figure 3: VDAC2 expression correlated with HPV16 E7 expression in cervical cancer.** The relationships between the expression of VDAC2/VDAC3 and HPV16 E7 were estimated. **A.** Representative figures of VDAC2/VDAC3 and HPV16 E7 expression were displayed in a row, with the figures on the left representing negative or low expression, figures in the middle representing light positive expression, and figures on the right representing positive expression (magnification 400X). **B.** The relative expression of VDAC2 in cervical cancer tissues grouped according to HPV16 E7 expression. \*,  $P < 0.05$ . **C.** The relative expression of VDAC3 in cervical cancer tissues grouped according to HPV16 E7 expression. \*,  $P < 0.05$ .

**Supplementary Table S1: The detailed clinicopathological parameters of the normal tissues and CIN tissues used in this assay.**

See Supplementary File 1

**Supplementary Table S2: The detailed clinicopathological parameters of the cervical cancer tissues used in this assay.**

See Supplementary File 2
